# Supplementary material for: Accurate assembly of the olive baboon (Papio anubis) genome using long-read and Hi-C data
Source: PubMed Central journal article supplement (PMC7719865; doi:10.1093/gigascience/giaa134), 2020-12-07
Supplement: giaa134_response_to_reviewer_comments_revision_2.pdf [file giaa134_response_to_reviewer_comments_revision_2.pdf]

## Author's Response To Reviewer Comments

Close

We have made the requested changes to the manuscript.

Close
