# Supplementary material for: Accurate assembly of the olive baboon (Papio anubis) genome using long-read and Hi-C data
Source: PubMed Central journal article supplement (PMC7719865; doi:10.1093/gigascience/giaa134), 2020-12-07
Supplement: giaa134_reviewer_1_report_original_submission.pdf [file giaa134_reviewer_1_report_original_submission.pdf]

## Reviewer Report

**Title:** Accurate assembly of the olive baboon (*Papio anubis*) genome using long-read and Hi-C data

**Version:** Original Submission    **Date:** 3/15/2020

**Reviewer name:** Xiao-Guang Qi

### Reviewer Comments to Author:

This manuscript reports a new whole genome assembly for a significantly useful nonhuman primate species, *Papio anubis*. Overall, the manuscript is clear to follow. Some questions may be helpful to improve the manuscript.

Reference style is not identical, examinations are needed.

Both package versions and parameter settings of the software used should be given.

In my view, during the assembly process, the Nanopore long-reads should be polished by Illumina paired-end reads firstly.

The figure legend of the Hi-C heatmap need to be improved, some details are missing.

I can not understand the meaning of the Fig.3. What is the reader supposed to conclude from the figure?

The genome completeness assesment shows that the completeness of Panu\_3.0 is better than that of Panubis1.0 (93.4% Vs 93%), please explaine this.

It would be good for the authors to explain how they have addressed the main problem with the HiC for the accurate orientation of the inversions within the scaffolds.

### Level of Interest

Please indicate how interesting you found the manuscript: Choose an item.

### Quality of Written English

Please indicate the quality of language in the manuscript: Choose an item.

### Declaration of Competing Interests

Please complete a declaration of competing interests, considering the following questions:

- Have you in the past five years received reimbursements, fees, funding, or salary from an organisation that may in any way gain or lose financially from the publication of this manuscript, either now or in the future?
- Do you hold any stocks or shares in an organisation that may in any way gain or lose financially from the publication of this manuscript, either now or in the future?
- Do you hold or are you currently applying for any patents relating to the content of the manuscript?

- Have you received reimbursements, fees, funding, or salary from an organization that holds or has applied for patents relating to the content of the manuscript?
- Do you have any other financial competing interests?
- Do you have any non-financial competing interests in relation to this paper?

If you can answer no to all of the above, write 'I declare that I have no competing interests' below. If your reply is yes to any, please give details below.

I declare that I have no competing interests

I agree to the open peer review policy of the journal. I understand that my name will be included on my report to the authors and, if the manuscript is accepted for publication, my named report including any attachments I upload will be posted on the website along with the authors' responses. I agree for my report to be made available under an Open Access Creative Commons CC-BY license (<http://creativecommons.org/licenses/by/4.0/>). I understand that any comments which I do not wish to be included in my named report can be included as confidential comments to the editors, which will not be published.

Choose an item.

To further support our reviewers, we have joined with Publons, where you can gain additional credit to further highlight your hard work (see: <https://publons.com/journal/530/gigascience>). On publication of this paper, your review will be automatically added to Publons, you can then choose whether or not to claim your Publons credit. I understand this statement.

Yes Choose an item.
