# Supplementary material for: Accurate assembly of the olive baboon (Papio anubis) genome using long-read and Hi-C data
Source: PubMed Central journal article supplement (PMC7719865; doi:10.1093/gigascience/giaa134), 2020-12-07
Supplement: giaa134_supplemental_file.pdf [file giaa134_supplemental_file.pdf]

## Supplementary Information

### Accurate assembly of the olive baboon (*Papio anubis*) genome using long-read and Hi-C data

Sanjit Singh Batra<sup>1</sup>, Michal Levy-Sakin<sup>2</sup>, Jacqueline Robinson<sup>3</sup>, Joseph Guillory<sup>4</sup>, Steffen Durinck<sup>4,5</sup>, Tauras P. Vilgalys<sup>6</sup>, Pui-Yan Kwok<sup>2,3</sup>, Laura A. Cox<sup>7,8</sup>, Somasekar Seshagiri<sup>4</sup>, Yun S. Song<sup>1,9,10</sup> and Jeffrey D. Wall<sup>3,\*</sup>

<sup>1</sup>Computer Science Division, University of California, Berkeley, CA 94720;

<sup>2</sup>Cardiovascular Research Institute, University of California San Francisco, San Francisco, CA 94143;

<sup>3</sup>Institute for Human Genetics, University of California San Francisco, San Francisco, CA 94143;

<sup>4</sup>Department of Molecular Biology, Genentech, Inc., 1 DNA Way, South San Francisco, CA 94080;

<sup>5</sup>Bioinformatics and Computational Biology Department, Genentech, Inc., 1 DNA Way, South San Francisco, CA 94080;

<sup>6</sup>Department of Evolutionary Anthropology, Duke University, Durham, NC 27705

<sup>7</sup>Center for Precision Medicine, Department of Internal Medicine, Section of Molecular Medicine, Wake Forest School of Medicine, Winston-Salem, NC 27101

<sup>8</sup>Southwest National Primate Research Center, Texas Biomedical Research Institute, San Antonio, TX 78245

<sup>9</sup>Department of Statistics, University of California, Berkeley, CA 94720;

<sup>10</sup>Chan Zuckerberg Biohub, San Francisco, CA 94158

\*Corresponding Author: [Jeff.Wall@ucsf.edu](mailto:Jeff.Wall@ucsf.edu)

This document contains Supplementary Figures S1-S6.

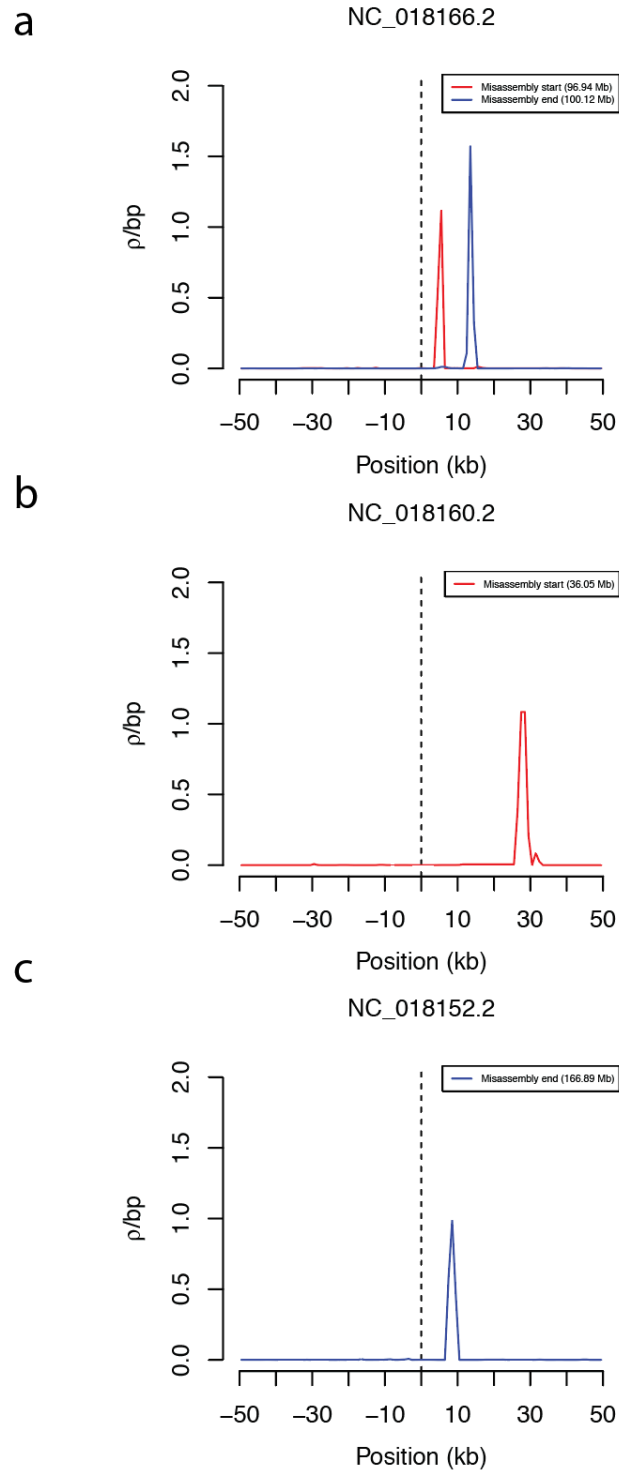

**Figure S1: Linkage disequilibrium based evidence for misassemblies in Panu\_3.0.**

Estimates of the population recombination rate  $\rho$  near the potential synteny breaks of the misassemblies identified in chromosomes a) NC\_018166.2 b) NC\_018160.2 and c) NC\_018152.2. Red represents the beginning of a misassembly event and blue represents the end of a misassembly event.

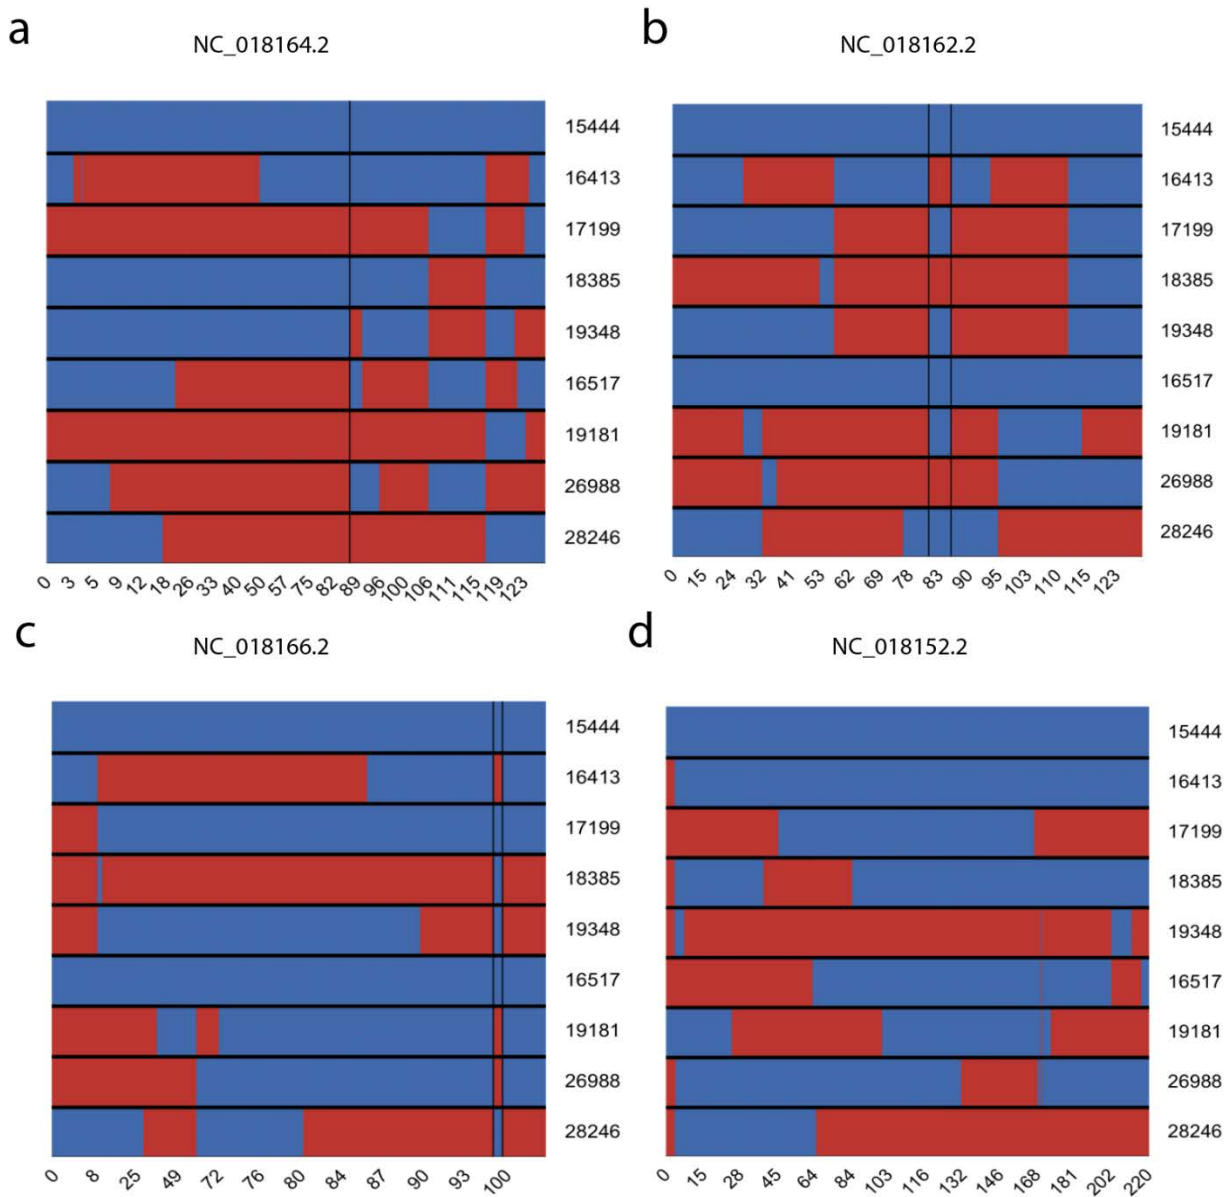

**Figure S2: Recombination based evidence for misassemblies in Panu\_3.0.**

Shown on the x-axis are positions along chromosomes in Panu\_3.0 where each row represents one of the 9 offsprings of sire 10173. Switches between red and blue within a row represent a recombination event. The vertical black lines represent locations where three or more recombinations occur at the same locus indicating a potential misassembly; except in (d) where recombination occurs at ~167Mb but is not shown by a vertical black line.

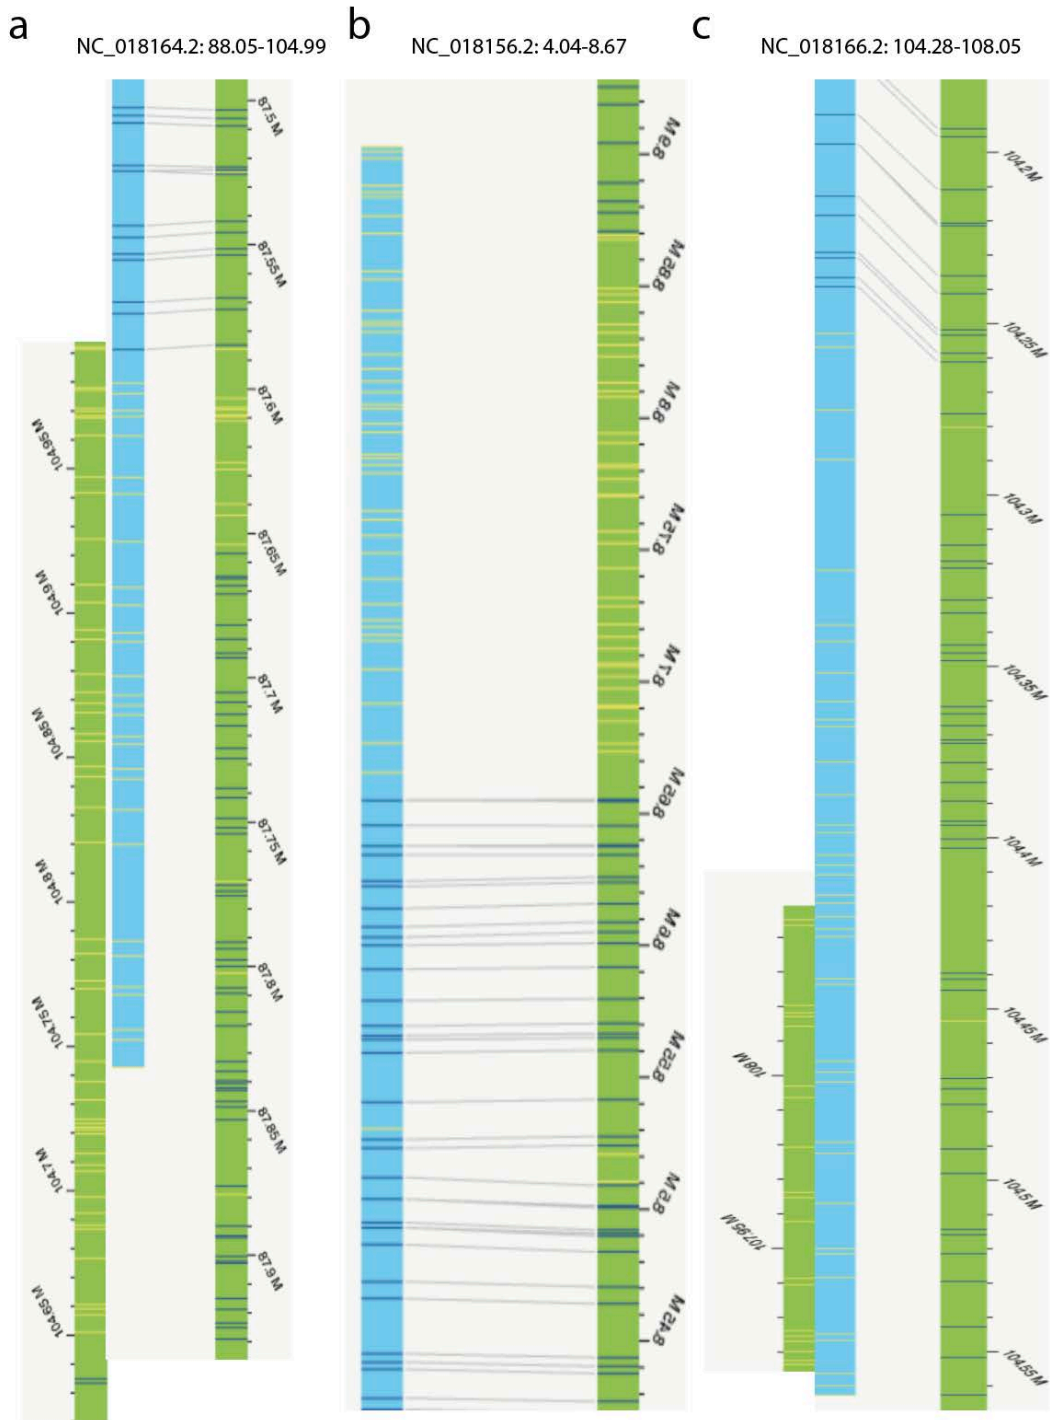

**Figure S3: Evidence for inversions in Panu\_3.0 based on bionano alignment.**

a) Inversion on chromosome NC\_018164.2 demonstrated by bionano optical map alignment.

b) Alignment to bionano optical map shows inverted coordinates due to an inversion on chromosome NC\_018156.2.

c) Bionano optical map alignment shows an inversion on chromosome NC\_018166.2.

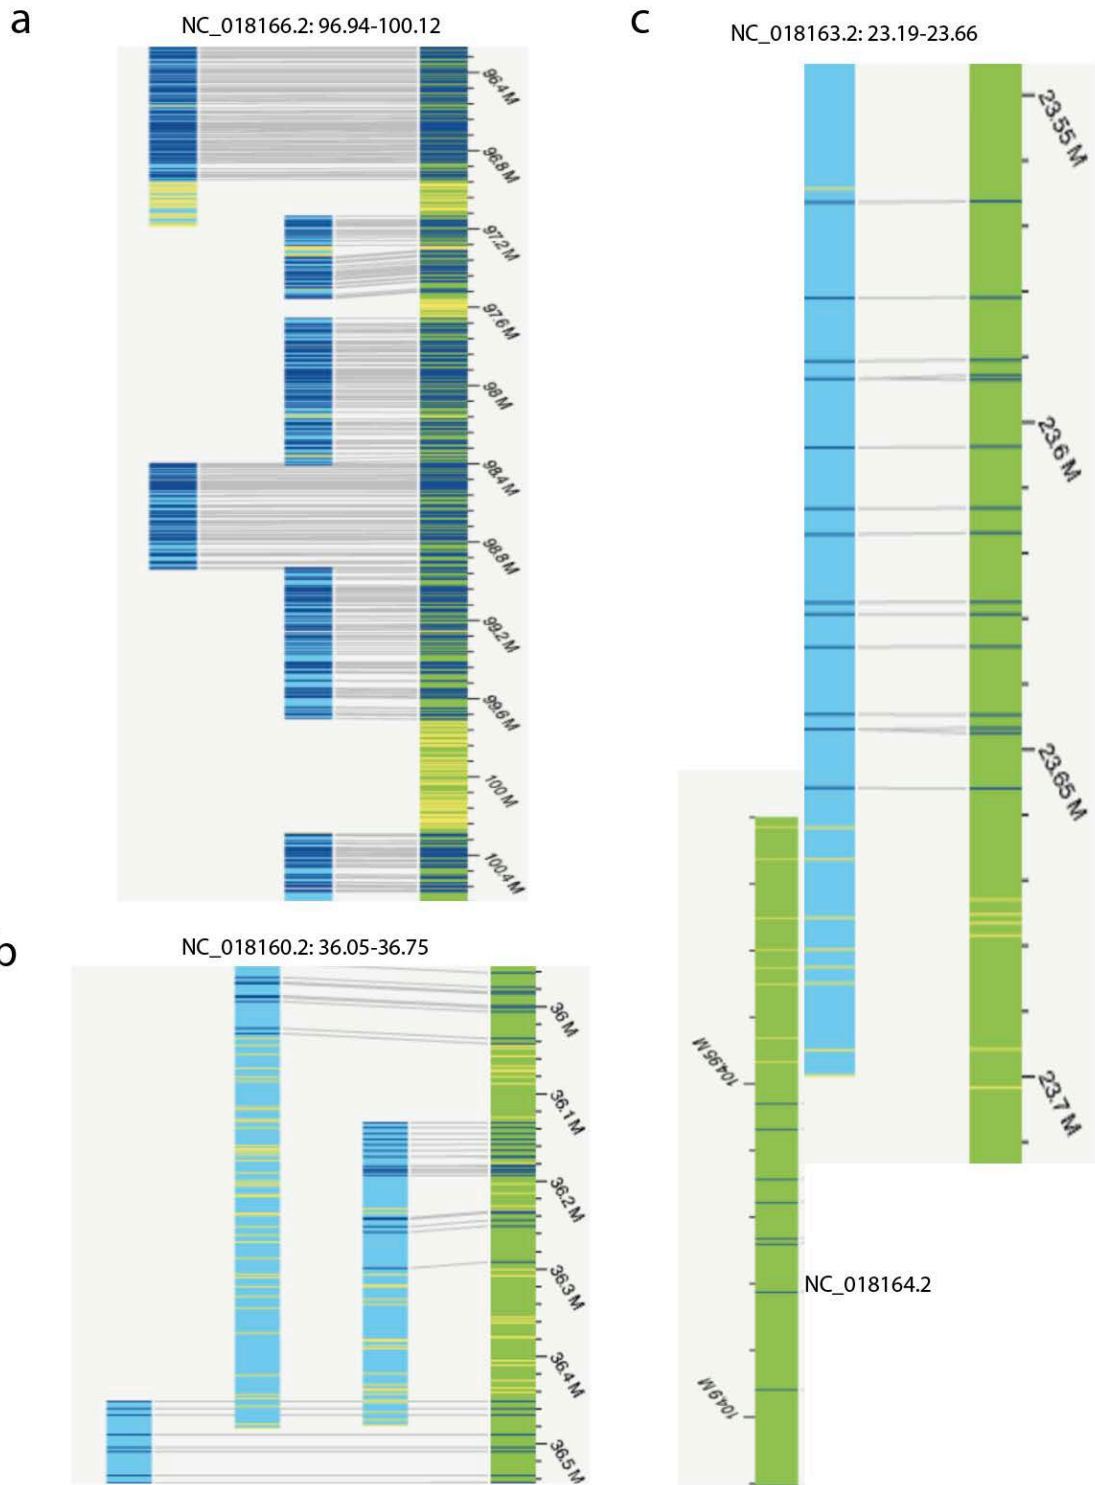

**Figure S4: Evidence for translocations in Panu\_3.0 based on bionano alignment.**

- a) Breaks in bionano alignment on chromosome NC\_018166.2 indicate a misassembly.
- b) Bionano optical map alignment demonstrate a misassembly on chromosome NC\_018160.2.
- c) Bionano optical map alignment shows a translocation between chromosomes NC\_018163.2 and NC\_018164.2.

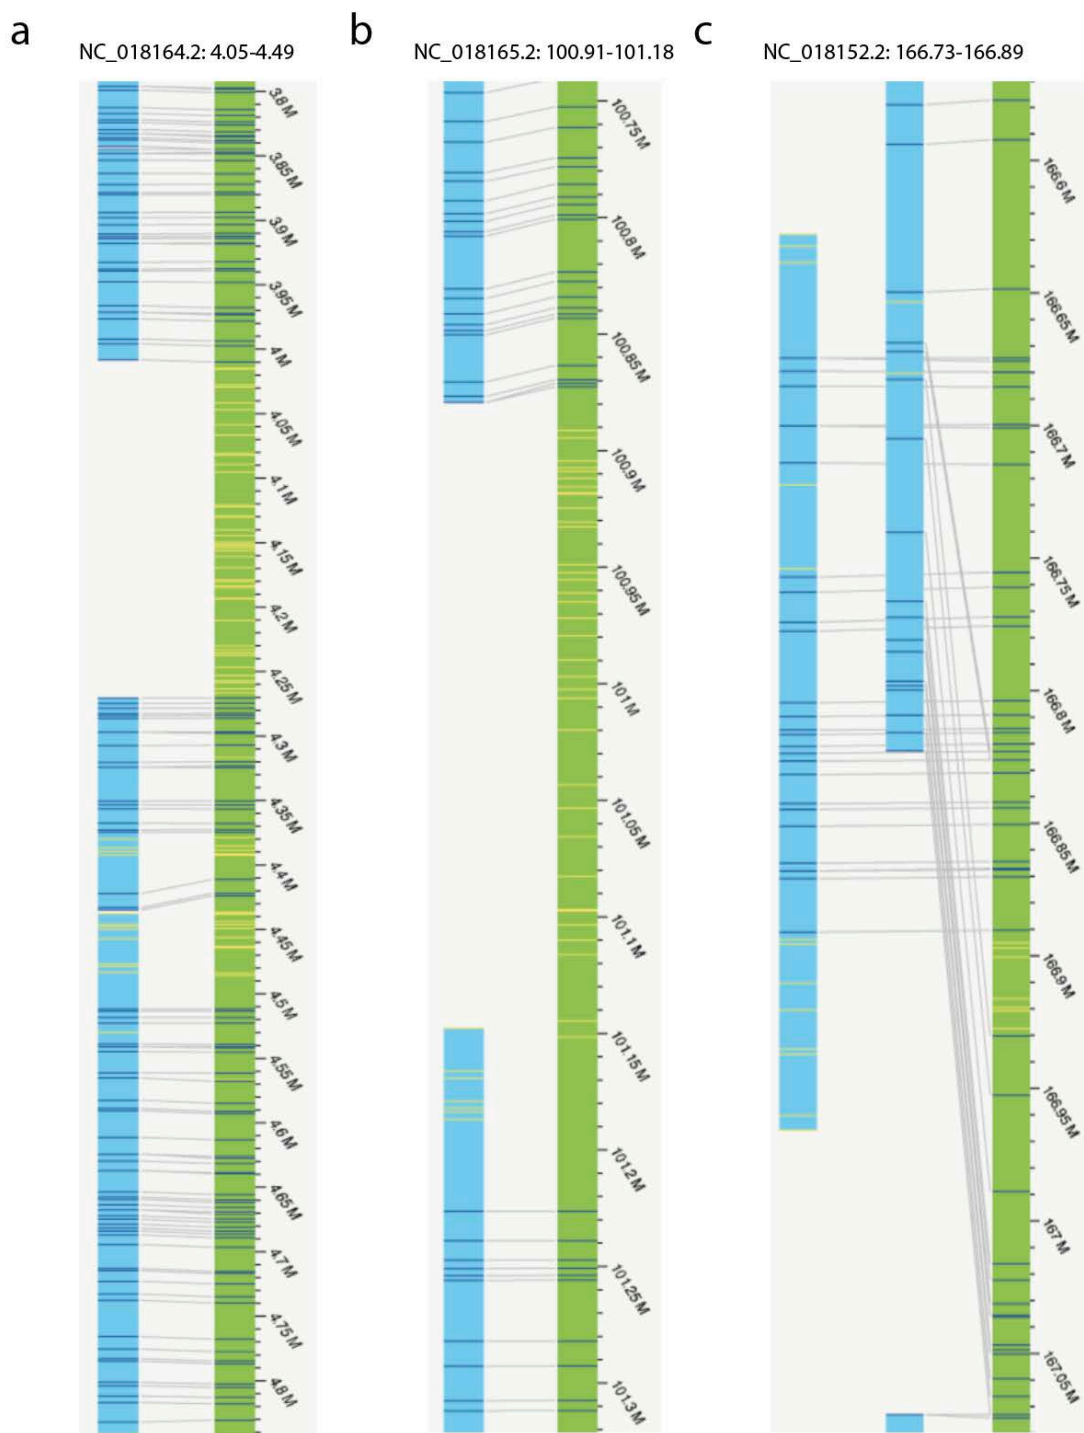

**Figure S5: Evidence for translocations in Panu\_3.0 based on bionano alignment.**

a) Breaks in bionano alignment on chromosome NC\_018164.2 indicate a misassembly.

b) Bionano optical map alignment demonstrate a misassembly on chromosome NC\_018165.2.

c) Bionano optical map alignment shows a translocation on chromosome NC\_018152.2.

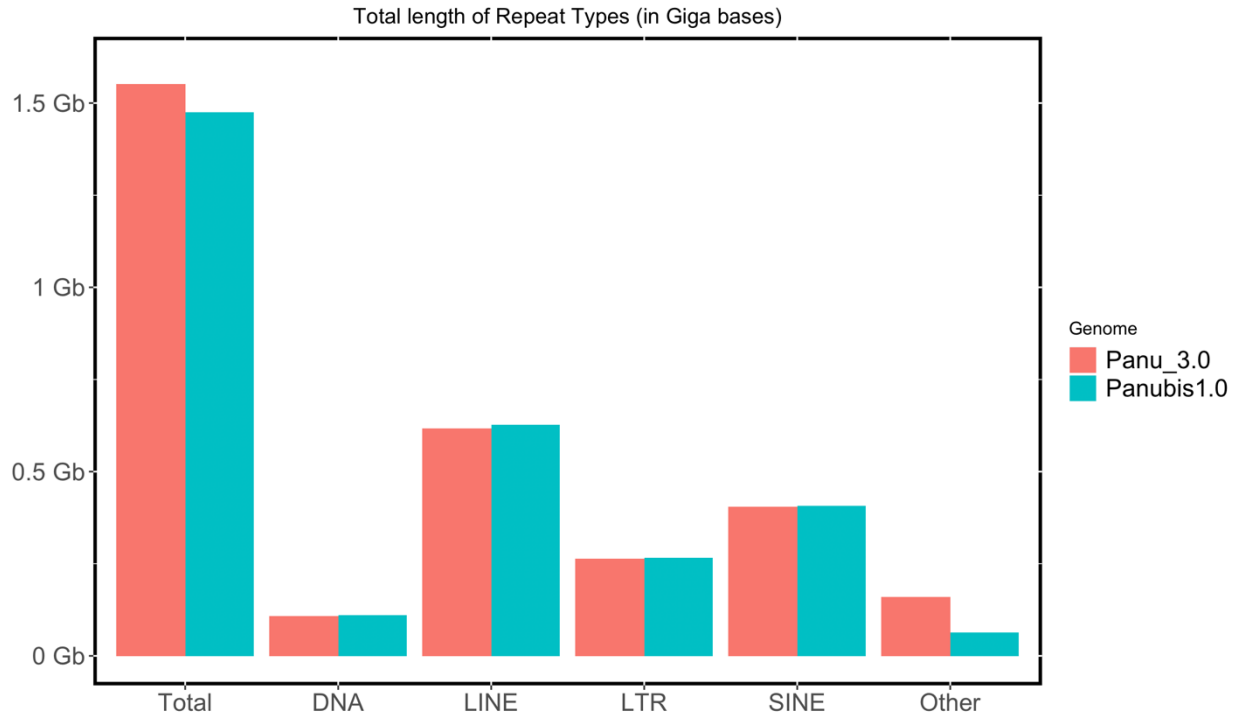

**Figure S6: RepeatMasker output analysis for Panubis1.0 and Panu\_3.0.**  
 Total length, represented in Giga bases (Gb), of different repeat types in Panubis1.0 and Panu\_3.0 obtained by analyzing the genomes with RepeatMasker.
